# Supplementary material for: Humane refinements improve public willingness to fund future research in entomology: Cross-sectional survey of UK and USA publics
Source: Research Square preprint supplement (doi:10.21203/rs.3.rs-8088823/v1), 2025-11-19
Supplement: Supplementary file 1 [file b491a4b7a1db9e8ae1adf0b4.pdf]

## Supplementary Figure S1 – SAS code used for analysis of quantitative data

```
/* Data for Public entomology survey 2025 USA and UK CloudResearch
participants responses*/

FILENAME REFFILE 'Insert path;

PROC IMPORT DATAFILE=REFFILE
    DBMS=CSV
    OUT=can_raw;
    GETNAMES=YES;
RUN;

proc print data=can_raw (obs=100);*use the obs option to get this to
print quickly!;
run;

data clean;
    set can_raw;
    if progress=100; *52 dropped, didn't finish survey;
    if duplicate_score=0; *7 dropped, participant already completed
survey;
    if consent=1; *28 dropped, participant did not consent to
participate in survey;
    if dem_quota_full=0; *95 dropped, demographic category filled;
    if attention_pass=1; *12 dropped, failed attention check;
*    if duration<618; *drop extreme values (95%+) to get a better
estimate of duration;
    if duration>98; *136 dropped, values less than half of the median
following Gesas rule;
    if quality_data=1; *67 dropped, didn't provide qualitative
opinion "no" "N/A" random letters or similar;
run;

proc print data=clean; *use the obs option to get this to print
quickly!;
run;

*rearrange data to see omnivore or non-omnivore;

data OV; *omnivore;
    set clean;
    if uk_diet=3 or usa_diet=3;
    diet_group=1;
run;
```

```

data VG; *vegetarian;
    set clean;
    if uk_diet=1 or usa_diet=1;
    diet_group=0;
run;

data VE; *vegan;
    set clean;
    if uk_diet=2 or usa_diet=2;
    diet_group=0;
run;

data diet_combo;
    set OV VG VE;
run;

proc sort data=diet_combo;
    by diet_group;

proc print data=diet_combo (obs=100);
run;

*rearrange data to see gender as woman or other;

data GW; *gender woman;
    set diet_combo;
    if uk_gender=1 or usa_gender=1;
    gender_group=1;
run;

data GM; *gender male;
    set diet_combo;
    if uk_gender=0 or usa_gender=0;
    gender_group=0;
run;

data GNS; *gender prefer not say;
    set diet_combo;
    if uk_gender=2 or usa_gender=2;
    gender_group=0;
run;

data gender_combo;
    set GW GM GNS;
run;

```

```

proc sort data=gender_combo;
    by gender_group;

proc print data=gender_combo (obs=100);
run;

*rearrange data to bring do you have children under 1 label;

data C1; *Yes;
    set gender_combo;
    if uk_children=1 or usa_children=1;
    children=1;
run;

data C2; *No;
    set gender_combo;
    if uk_children=0 or usa_children=0;
    children=0;
run;

data children_combo;
    set C1 C2;
run;

proc sort data=children_combo;
    by children;

proc print data=children_combo (obs=100);
run;

*rearrange data to bring do you have pets under 1 label;

data P1; *Yes;
    set children_combo;
    if uk_pets=1 or usa_pets=1;
    pets=1;
run;

data P2; *No;
    set children_combo;
    if uk_pets=0 or usa_pets=0;
    pets=0;
run;

data pets_combo;
    set P1 P2;

```

```

run;

proc sort data=pets_combo;
    by pets;

proc print data=pets_combo (obs=100);
run;

*rearrange data to see income in 4 groups;

data I1; *less than $15,000 USD or 12,000 GBP;
    set pets_combo;
    if uk_income=1 or usa_income=1;
    income_group=1;
run;

data I2; *$15,000-$24,999 USD or 12,000-19,999 GBP;
    set pets_combo;
    if uk_income=2 or usa_income=2;
    income_group=1;
run;

data I3; *$25,000-$34,999 USD or 20,000-27,999 GBP;
    set pets_combo;
    if uk_income=3 or usa_income=3;
    income_group=2;
run;

data I4; *$35,000-$49,999 USD or 28,000-39,999 GBP;
    set pets_combo;
    if uk_income=4 or usa_income=4;
    income_group=2;
run;

data I5; *$50,000-$74,999 USD or 40,000-59,999 GBP;
    set pets_combo;
    if uk_income=5 or usa_income=5;
    income_group=3;
run;

data I6; *$75,000-$99,999 USD or 60,000-79,999 GBP;
    set pets_combo;
    if uk_income=6 or usa_income=6;
    income_group=3;
run;

```

```

data I7; *$100,000-$149,999 USD or 80,000-119,999 GBP;
    set pets_combo;
    if uk_income=7 or usa_income=7;
    income_group=4;
run;

data I8; *$150,000-$199,999 USD or 120,000-159,999 GBP;
    set pets_combo;
    if uk_income=8 or usa_income=8;
    income_group=4;
run;

data I9; *$200,000 USD or 160,000 GBP and above;
    set pets_combo;
    if uk_income=9 or usa_income=9;
    income_group=4;
run;
data income_combo;
    set I1 I2 I3 I4 I5 I6 I7 I8 I9;
    run;
proc sort data=income_combo;
    by income_group;

proc print data=income_combo (obs=100);
run;

*rearrange data to see age in 3 groups;

data A1; *18-34 years - UK here and USA in data A5 below;
    set income_combo;
    if uk_age>17 and uk_age<35;
    age_group=1;
run;

data A2; *35-64 years UK;
    set income_combo;
    if uk_age>34 and uk_age<65;
    age_group=2;
run;

data A3; *35-64 years USA;
    set income_combo;
    if usa_age>34 and usa_age<65;
    age_group=2;
run;

```

```

data A4; *65 years and over;
    set income_combo;
    if uk_age>64 or usa_age>64;
    age_group=3;
run;

data A5; *18-34 years USA;
    set income_combo;
    if usa_age>17 and usa_age<35;
    age_group=1;
run;
data age_combo;
    set A1 A2 A3 A4 A5;
    run;
proc sort data=age_combo;
    by age_group;
proc print data=age_combo (obs=100);
run;

data AT1; * bringing UK and USA age as a continuous variable under
one;
    set age_combo;
    age=uk_age;
run;

data AT2;
    set age_combo;
    age=usa_age;
run;

data age_both_together;
    set AT1 AT2;
    if age <=.Z then delete;
run;

proc sort data=age_both_together;
    by age;
proc print data=age_both_together (obs=100);
run;

data R1; * bringing UK and USA region into one variable;
    set age_both_together;
    region=uk_region;
run;

data R2;

```

```

        set age_both_together;
        region=usa_region;
run;

data region_combo;
    set R1 R2;
    if region <=.Z then delete;
run;

proc sort data=region_combo;
    by region;
proc print data=region_combo (obs=100);
run;

*bringing UK and USA where lived as child into one variable;
data LC1; *urban;
    set region_combo;
    if uk_lived_child=1 or usa_lived_child=1;
    lived_child=1;
run;

data LC2; *suburban;
    set region_combo;
    if uk_lived_child=2 or usa_lived_child=2;
    lived_child=2;
run;

data LC3; *rural;
    set region_combo;
    if uk_lived_child=3 or usa_lived_child=3;
    lived_child=3;
run;

data LC_combo;
    set LC1 LC2 LC3;
run;

proc sort data=LC_combo;
    by lived_child;

proc print data=LC_combo (obs=100);
run;

*bringing UK and USA where live now into one variable;
data LN1; *urban;
    set LC_combo;

```

```

        if uk_currently_live=1 or usa_currently_live=1;
        currently_live=1;
run;

data LN2; *suburban;
    set LC_combo;
    if uk_currently_live=2 or usa_currently_live=2;
    currently_live=2;
run;

data LN3; *rural;
    set LC_combo;
    if uk_currently_live=3 or usa_currently_live=3;
    currently_live=3;
run;

data LN_combo;
    set LN1 LN2 LN3;
run;

proc sort data=LN_combo;
    by currently_live;

proc print data=LN_combo (obs=100);
run;

*bringing UK and USA familiar with research into one variable;
data FR1; *not at all;
    set LN_combo;
    if uk_familiar_research=1 or usa_familiar_research=1;
    familiar_research=1;
run;

data FR2; *slightly;
    set LN_combo;
    if uk_familiar_research=2 or usa_familiar_research=2;
    familiar_research=2;
run;

data FR3; *moderately;
    set LN_combo;
    if uk_familiar_research=3 or usa_familiar_research=3;
    familiar_research=3;
run;

data FR4; *very;

```



```

    set LN_combo;
    if uk_familiar_research=4 or usa_familiar_research=4;
    familiar_research=4;
run;

data FR5; *extremely;
    set LN_combo;
    if uk_familiar_research=5 or usa_familiar_research=5;
    familiar_research=5;
run;
data FR_combo;
    set FR1 FR2 FR3 FR4 FR5;
run;

proc sort data=FR_combo;
    by familiar_research;

proc print data=FR_combo (obs=100);
run;

*bringing UK and USA politics into one variable;
data P1; *labour;
    set FR_combo;
    if uk_politics=1;
    politics=1;
run;

data P2; *Conservative;
    set FR_combo;
    if uk_politics=2;
    politics=2;
run;

data P3; *liberal democrat;
    set FR_combo;
    if uk_politics=3;
    politics=3;
run;

data P4; *independent;
    set FR_combo;
    if uk_politics=4 or usa_politics=4;
    politics=4;
run;

data P5; *none of the above;

```

```
    set FR_combo;
    if uk_politics=5 or usa_politics=5;
    politics=5;
run;
```

```
data P6; *no opinion;
    set FR_combo;
    if uk_politics=6 or usa_politics=6;
    politics=6;
run;
```

```
data P7; *republican;
    set FR_combo;
    if usa_politics=7;
    politics=7;
run;
```

```
data P8; *democrat;
    set FR_combo;
    if usa_politics=8;
    politics=8;
run;
```

```
data politics_combo;
    set P1 P2 P3 P4 P5 P6 P7 P8;
run;
```

```
proc sort data=politics_combo;
*    by politics;
    by tx;
proc print data=politics_combo (obs=100);
run;
```

\*need to re-arrange the data to have aware of entomology practice  
labelled identically for all treatments;

```
data AP1;
    set politics_combo;
    if tx=1;
    aware_practice = aware_practice_1;
run;
```

```
data AP2;
    set politics_combo;
    if tx=2;
    aware_practice = aware_practice_2;
```

```

run;

data AP3;
  set politics_combo;
  if tx=3;
  aware_practice = aware_practice_3;
run;

data AP4;
  set politics_combo;
  if tx=4;
  aware_practice = aware_practice_4;
run;

data AP5;
  set politics_combo;
  if tx=5;
  aware_practice = aware_practice_5;
run;

data knowledge_combo;
  set AP1 AP2 AP3 AP4 AP5;
run;

proc sort data=knowledge_combo;
  by aware_practice;

proc print data=knowledge_combo (obs=100);
run;

```

\*need to re-arrange the data to have support for original entomology practice labelled identically for all treatments;

```

data S01;
  set knowledge_combo;
  if tx=1;
  support_original = support_original_1;
run;

data S02;
  set knowledge_combo;
  if tx=2;
  support_original = support_original_2;
run;

data S03;

```

```
    set knowledge_combo;  
    if tx=3;  
    support_original = support_original_3;  
run;
```

```
data S04;  
    set knowledge_combo;  
    if tx=4;  
    support_original = support_original_4;  
run;
```

```
data S05;  
    set knowledge_combo;  
    if tx=5;  
    support_original = support_original_5;  
run;
```

```
data SO_combo;  
    set S01 S02 S03 S04 S05;  
run;
```

```
proc sort data=SO_combo;  
    by support_original;
```

```
proc print data=SO_combo (obs=100);  
run;
```

\*need to re-arrange the data to have support for neutral change  
entomology practice labelled identically for all treatments;

```
data SN1;  
    set SO_combo;  
    if tx=1;  
    support_neutral = support_neutral_1;  
run;
```

```
data SN2;  
    set SO_combo;  
    if tx=2;  
    support_neutral = support_neutral_2;  
run;
```

```
data SN3;  
    set SO_combo;  
    if tx=3;  
    support_neutral = support_neutral_3;
```

```
run;

data SN4;
  set SO_combo;
  if tx=4;
  support_neutral = support_neutral_4;
run;
```

```
data SN5;
  set SO_combo;
  if tx=5;
  support_neutral = support_neutral_5;
run;
```

```
data SN_combo;
  set SN1 SN2 SN3 SN4 SN5;
run;
```

```
proc sort data=SN_combo;
  by support_neutral;
```

```
proc print data=SN_combo (obs=100);
run;
```

\*need to re-arrange the data to have support for refined change entomology practice labelled identically for all treatments;

```
data SR1;
  set SN_combo;
  if tx=1;
  support_refined = support_refined_1;
run;
```

```
data SR2;
  set SN_combo;
  if tx=2;
  support_refined = support_refined_2;
run;
```

```
data SR3;
  set SN_combo;
  if tx=3;
  support_refined = support_refined_3;
run;
```

```
data SR4;
```

```
    set SN_combo;  
    if tx=4;  
    support_refined = support_refined_4;  
run;
```

```
data SR5;  
    set SN_combo;  
    if tx=5;  
    support_refined = support_refined_5;  
run;
```

```
data SR_combo;  
    set SR1 SR2 SR3 SR4 SR5;  
run;
```

```
proc sort data=SR_combo;  
    by support_refined;
```

```
proc print data=SR_combo (obs=100);  
run;
```

\*need to re-arrange the data with attitude construct labelled identically for all treatments;  
\*one intuitive way of of doing this is just through a series of data statements as shown below;

```
data T1;  
    set SR_combo;  
    if tx=1;  
    attitude_a = attitude_1_a;  
    attitude_b = attitude_1_b;  
    attitude_c = attitude_1_c;  
run;
```

```
data T2;  
    set SR_combo;  
    if tx=2;  
    attitude_a = attitude_2_a;  
    attitude_b = attitude_2_b;  
    attitude_c = attitude_2_c;  
run;
```

```
data T3;  
    set SR_combo;  
    if tx=3;  
    attitude_a = attitude_3_a;
```

```
    attitude_b = attitude_3_b;  
    attitude_c = attitude_3_c;  
run;
```

```
data T4;  
    set SR_combo;  
    if tx=4;  
    attitude_a = attitude_4_a;  
    attitude_b = attitude_4_b;  
    attitude_c = attitude_4_c;  
run;
```

```
data T5;  
    set SR_combo;  
    if tx=5;  
    attitude_a = attitude_5_a;  
    attitude_b = attitude_5_b;  
    attitude_c = attitude_5_c;  
run;
```

```
data tx_combo;  
    set T1 T2 T3 T4 T5;  
    run;  
proc sort data=tx_combo;  
    by tx;
```

```
proc print data=tx_combo (obs=100);  
run;
```

\*due to attention check need to reverse scores in attitude\_b (forgot before survey launch);

```
data rev_combo;  
    set tx_combo;  
    if attitude_b=1 then attitude_b_r=7;  
    if attitude_b=2 then attitude_b_r=6;  
    if attitude_b=3 then attitude_b_r=5;  
    if attitude_b=4 then attitude_b_r=4;  
    if attitude_b=5 then attitude_b_r=3;  
    if attitude_b=6 then attitude_b_r=2;  
    if attitude_b=7 then attitude_b_r=1;  
*    keep id attitude_b attitude_b_r;  
run;
```

```
proc sort data=rev_combo;  
    by id;
```

```
proc print data=rev_combo (obs=100);  
run;
```

\*create attitude construct and keep relevant variables;

```
data final;  
  set rev_combo;  
  attitude_score = (attitude_a+attitude_b_r+attitude_c)/3;  
  keep id tx attitude_score aware_practice support_original  
  support_neutral support_refined  
  country region age age_group gender_group income_group children  
  pets diet_group lived_child  
  currently_live politics familiar_research attitude_a attitude_b_r  
  attitude_c;  
run;  
proc sort data=final;  
  by id;
```

```
proc print data=final (obs=100);  
run;
```

\*Now we need to combine support\_original support\_neutral  
support\_refined into one variable;

\*will use this data set with 4083 observations (repeated measures) in  
funding support regression model;

```
data FS1;  
  set final;  
  funding_support = support_original;  
  group = 1;  
run;
```

```
data FS2;  
  set final;  
  funding_support = support_neutral;  
  group = 2;  
run;
```

```
data FS3;  
  set final;  
  funding_support = support_refined;  
  group = 3;  
run;
```

```
data funding_combo;  
  set FS1 FS2 FS3;
```



```

run;
proc sort data=funding_combo;
  by group;

proc print data=funding_combo (obs=100);
run;

proc boxplot data=funding_combo;
  plot funding_support*group;
run;

*below Cronbach's coefficient alpha to estimate reliability of
attitude construct (use standardized);

proc corr data=final nomiss alpha plots(maxpoints=10000)=matrix;
  var attitude_a attitude_b_r attitude_c;
run;

*Factor Analysis checking unidimensionality of
constructs(eigenvalues>1);

*-attitude construct;
proc factor data=final corr scree ev rotate = varimax method=prininit
priors=smc;
  var attitude_a attitude_b_r attitude_c;
run;

***Aware of practice*** - frequency data for reporting in manuscript;

Proc freq data=final;
  table aware_practice*tx / plots=all;
run;

*Graphing;

proc sgplot data=final;
  vbar tx / group=aware_practice groupdisplay=cluster;
run;

***ATTITUDE SCORE MODEL*** Not include income or politics since not
equal between UK&USA;

proc anova data=final; *post hoc analysis of demographic factors;
  class tx age_group country gender_group children pets lived_child
currently_live diet_group familiar_research;

```

```

    model attitude_score = tx age_group country gender_group children
pets lived_child currently_live diet_group familiar_research;
    means tx age_group country gender_group children pets lived_child
currently_live diet_group familiar_research / tukey;
run;

```

\*ANNOVA cautioned proc GLM might be more appropriate;

```

proc glm data=final plots=all; *check to see what to include in model;
    class tx country gender_group children pets lived_child
currently_live diet_group familiar_research;
    model attitude_score = tx age country gender_group children pets
lived_child currently_live diet_group familiar_research;
run;

```

\*Checking correlation of sig demographics at  $p < 0.20$ ;

```

proc corr data=final;
    Var country gender_group children diet_group familiar_research;
run;

```

\*Checking distribution of participants of significant demographics  
across all 5 treatments\*;

```

    /*Distribution of attitude score by system*/
    Proc freq data=final;
        table gender_group*tx / expected chisq out=gender_group
plots=all;
    run; /*-->Confirmed that not unexpected (uneven) distribution
between tx*/
    Proc freq data=final;
        table children*tx / expected chisq out=children plots=all;
    run; /*-->Confirmed that not unexpected (uneven) distribution
between tx*/;
    Proc freq data=final;
        table diet_group*tx / expected chisq out=diet_group
plots=all;
    run; *Unexpected (uneven) distribution between tx so variable
removed;
    Proc freq data=final;
        table familiar_research*tx / expected chisq
out=familiar_research plots=all;
    run; *Confirmed that not unexpected (uneven) distribution between
tx;
    Proc freq data=final;
        table country*tx / expected chisq out=country plots=all;
    run; *Confirmed that not unexpected (uneven) distribution between
tx;

```

```

proc glm data=final plots=all; *check for tx_attitude interaction with
sig variables;
    class tx country gender_group children familiar_research;
    model attitude_score = tx country gender_group children
familiar_research tx*country tx*gender_group tx*children
tx*familiar_research;
    run;
* tx*country, tx*gender_group interactions significant p<0.20;

*FINAL Attitude Model without all P<0.20 variables and interactions*;

proc glm data=final plots=all; *could not use actual sample
demographics for LMS calculations (obs margins);
    class tx country gender_group children familiar_research;
    model attitude_score = tx country gender_group children
familiar_research tx*country tx*gender_group;
    lsmeans gender_group / stderr cl pdiff diff;
    lsmeans children / stderr cl pdiff diff;
    lsmeans country*tx / stderr cl pdiff diff;
    lsmeans familiar_research / stderr cl pdiff diff;
run;

proc means n mean std stderr max min data=final; *this allows you to
see response means and other basic stats;
    var attitude_score;
run;

proc sort data=final;
    by tx;

proc means n mean std stderr max min data=final; *this allows you to
see response means and other basic stats;
    by tx;
    var attitude_score;
run;

proc means n mean std stderr max min data=final; *this allows you to
see response means and other basic stats;
    by tx;
    class country;
    var attitude_score;
run;

proc sort data=final;
    by gender_group;

```

```
proc means n mean std stderr max min data=final; *this allows you to  
see response means and other basic stats;
```

```
    by gender_group;  
    var attitude_score;
```

```
proc sort data=final;  
    by children;
```

```
proc means n mean std stderr max min data=final; *this allows you to  
see response means and other basic stats;
```

```
    by children;  
    var attitude_score;
```

```
proc sort data=final;  
    by familiar_research;
```

```
proc means n mean std stderr max min data=final; *this allows you to  
see response means and other basic stats;
```

```
    by familiar_research;  
    var attitude_score;
```

```
/*Graphing*/;
```

```
proc sgplot data=final;  
    vbox attitude_score / group=tx;
```

```
run;
```

```
proc sgplot data=final;  
    vbox attitude_score / group=gender_group;
```

```
run;
```

```
proc sgplot data=final;  
    vbox attitude_score / category=tx group=country;
```

```
run;
```

```
proc sgplot data=final;  
    vbox attitude_score / group=children;
```

```
run;
```

```
proc sgplot data=final;  
    vbox attitude_score / group=familiar_research;
```

```
run;
```

```
*FUNDING SUPPORT MODEL** Not include income or politics since not  
equal between UK&USA;
```

```

proc anova data=funding_combo; *post hoc analysis of demographic
factors;
    class tx age_group country gender_group children pets lived_child
currently_live diet_group familiar_research;
    model funding_support = tx age_group country gender_group
children pets lived_child currently_live diet_group familiar_research;
    means tx age_group country gender_group children pets lived_child
currently_live diet_group familiar_research / tukey;
run;

```

\*Using proc mixed due to repeated measures in funding\_support;

```

proc mixed data=funding_combo plots=all; *check to see what to include
in model;
    class group id tx country gender_group children pets lived_child
currently_live diet_group familiar_research;
    model funding_support = group tx age_group country gender_group
children pets lived_child currently_live diet_group familiar_research;
    repeated / type=cs sub=ID;
    lsmeans group / pdiff=all;
run;

```

\*Checking distribution of participants of significant demographics at  $p < 0.20$ ;

\*Distribution of demographic var by treatment\* only one not investigated was currently\_live;

```

Proc freq data=final;*use data=final so no psudo-replication;
    table currently_live*tx / expected chisq out=currently_live
plots=all;
run; *-->Confirmed that not unexpected (uneven) distribution
between tx*;

```

```

proc mixed data=funding_combo plots=all; *explore group interactions;
    class group id tx country gender_group children currently_live
familiar_research;
    model funding_support = group tx country gender_group children
currently_live familiar_research tx*group country*group
gender_group*group children*group currently_live*group
familiar_research*group;
    repeated / type=cs sub=ID;
    lsmeans group / pdiff=all;
run;
*tx*group, country*group, gender_group*group interactions sign at
 $p < 0.20$ ;

```

```

*FINAL Funding Support Model without all P<0.20 variables and
interactions*;
ods graphics on / discretemax=1400;

proc mixed data=funding_combo plots=all ; *obsargins to use actual
sample demographics for LMS calculations;
    class group id tx country gender_group children currently_live
familiar_research;
    model funding_support = group tx country gender_group children
currently_live familiar_research tx*group country*group
gender_group*group;
    repeated / type=cs sub=ID;
    lsmeans group / cl obsargins pdiff diff ;
    lsmeans tx / cl obsargins pdiff diff;
    lsmeans country / cl obsargins pdiff diff;
    lsmeans gender_group / cl obsargins pdiff diff;
    lsmeans children / cl obsargins pdiff diff;
    lsmeans familiar_research / cl obsargins pdiff diff;
    lsmeans group*tx / cl obsargins pdiff diff;
    lsmeans group*country / cl obsargins pdiff diff;
    lsmeans group*gender_group / cl obsargins pdiff diff;
run;

proc means n mean std stderr max min data=final; *this allows you to
see response means and other basic stats;
    var support_original support_neutral support_refined;
run;

proc sort data=final;
    by tx;

proc means n mean std stderr max min data=final; *this allows you to
see response means and other basic stats;
    by tx;
    var support_original support_neutral support_refined;
run;

proc sort data=funding_combo;
    by country;

proc means n mean std stderr max min data=funding_combo; *this allows
you to see response means and other basic stats;
    by country;
    var funding_support;
run;

```

```

proc sort data=final;
    by country;

proc means n mean std stderr max min data=final; *this allows you to
see response means and other basic stats;
    by country;
    var support_original support_neutral support_refined;
run;

proc sort data=funding_combo;
    by gender_group;

proc means n mean std stderr max min data=funding_combo; *this allows
you to see response means and other basic stats;
    by gender_group;
    var funding_support;
run;

proc sort data=final;
    by gender_group;

proc means n mean std stderr max min data=final; *this allows you to
see response means and other basic stats;
    by gender_group;
    var support_original support_neutral support_refined;
run;

proc sort data=funding_combo;
    by children;

proc means n mean std stderr max min data=funding_combo; *this allows
you to see response means and other basic stats;
    by children;
    var funding_support;
run;

proc sort data=final;
    by children;

proc means n mean std stderr max min data=final; *this allows you to
see response means and other basic stats;
    by children;
    var support_original support_neutral support_refined;
run;

proc sort data=funding_combo;

```

```

    by familiar_research;

proc means n mean std stderr max min data=funding_combo; *this allows
you to see response means and other basic stats;
    by familiar_research;
    var funding_support;
run;

proc sort data=final;
    by familiar_research;

proc means n mean std stderr max min data=final; *this allows you to
see response means and other basic stats;
    by familiar_research;
    var support_original support_neutral support_refined;
run;

/*Graphing*/

proc sgplot data=funding_combo;
    vbox funding_support / group=group;
run;

proc sgplot data=funding_combo;
    vbox funding_support / category=tx group=group;
run;

```



## **Supplementary Figure S2 – Codebook used for analysis of qualitative data**

### **Codebook 1 – Attitude towards practices used during entomology research**

#### **Theme – Focused on the animals**

1. Animal impacts – rational provided by participant asserts animals will experience or not experience pain, suffering, distress, harm or similar
2. Value of life – rational provided by participant asserts life, animal life, insect life, or similar has or does not have value

#### **Theme – Focused on ethics**

3. Cruelty – rational provided by participant asserts that the practice is cruel
4. Normative values – rational provided by participant asserts that practices are broadly acceptable or not acceptable animal treatment
5. Utilitarian reasoning – rational provided by participant asserts a conscious weighing of harms to insects (animal impacts) and benefits to society (scientific progress)

#### **Theme – Focused on science**

6. Scientific progress – rational provided by participant asserts that practices are required or not required to advance scientific progress or similar
7. Alternatives – rational provided by participant asserts there is, isn't, or should find alternatives to the procedures described

#### **Theme – Focused on participants**

8. Ambivalence – rational provided by participant asserts no opinion, doesn't matter, doesn't know, no comment, or that they don't care
9. Confused – rational provided by participant asserts they didn't understand the question asked
10. Unable to describe – rational provided by participant asserts they are unsure why, describes a belief, feeling or existing opinion
11. Lack information – rational provided by participant asserts they need more information to justify opinion
12. Unfamiliar – participant states they are unaware or unfamiliar about the topic

**Theme – Other** – rational provided by participant does not fit into prevailing themes or is unclear

## **Codebook 2 – Likelihood to support public funding of future entomology research**

### **Theme – Focused on the research procedures**

1. Change in procedure – rational provided by participant asserts refinements improve or did not change willingness to fund research or that additional refinements to procedures are required
2. Never support – rational provided by participant asserts they are against animal research, will not support, or the research as cruel
3. Disregard for insects – rational provided by participant asserts a disregard, unpleasantness, or a lack of concern for insects or their experiences

### **Theme – Focused on the scientific merit**

4. Necessity – rational provided by participant asserts described research is needed or unnecessary for scientific advancement
5. Trust scientists – rational provided by participant asserts they trust scientists and their decisions

### **Theme – Focused on the societal benefit**

6. Public value – rational provided by participant asserts decision was based on importance of research to broader society
7. Financial cost – rational provided by participant asserts financial cost to society influenced their decision
8. Alternative benefits – rational provided by participant asserts the public interest would be better served by not funding insect research or funding other types of research

### **Theme – Focused on the participant**

9. Ambivalence – rational provided by participant asserts no opinion, doesn't matter, no comment, or that they don't care
10. Unable to describe – rational provided by participant asserts they are unsure why, don't know, describes a belief, feeling or existing opinion
11. Lack information – rational provided by participant asserts they need more information to justify opinion
12. Unfamiliar – participant states they are unaware or unfamiliar about the topic

**Theme – Other** – rational provided by participant does not fit into prevailing themes or is unclear
